# Supplementary material for: Double butterfly-shaped octanuclear dysprosium clusters: structure, magnetism and assembly mechanism
Source: Royal Society of Chemistry journal article supplement (doi:10.1039/d2ce01506d), 2022-11-28
Supplement: d2ce01506d1.pdf [file d2ce01506d1.pdf]

## Supporting Information

### **Double Butterfly-shaped Octanuclear Dysprosium Cluster: Structure, Magnetism and Assembly Mechanism**

Yun-Lan Li,<sup>a</sup> Zhong-Ming Huang,<sup>a</sup> Hai-Ling Wang,<sup>a</sup> Zhong-Hong Zhu,<sup>a,\*</sup> Fu-Pei Liang,<sup>a</sup> and Hua-Hong Zou<sup>a,\*</sup>

<sup>a</sup>School of Chemistry and Pharmaceutical Sciences, State Key Laboratory for Chemistry and Molecular Engineering of Medicinal Resources, Guangxi Normal University, Guilin 541004, P. R. China

\*E-mail (Corresponding author): 18317725515@163.com (Z.-H. Zhu), gxnuchem@foxmail.com (H.-H. Zou).

## Table of Contents:

| Supporting Tables  |                                                                                                                                                                                                 |
|--------------------|-------------------------------------------------------------------------------------------------------------------------------------------------------------------------------------------------|
| <b>Table S1</b>    | Crystallographic data of clusters <b>1</b> and <b>2</b> .                                                                                                                                       |
| <b>Table S2</b>    | Selected bond lengths (Å) and angles (°) of clusters <b>1</b> and <b>2</b> .                                                                                                                    |
| <b>Table S3</b>    | <i>SHAPE</i> analysis of the Dy1 in the clusters <b>1</b> and <b>2</b> .                                                                                                                        |
| <b>Table S4</b>    | <i>SHAPE</i> analysis of the Dy2 in the clusters <b>1</b> and <b>2</b> .                                                                                                                        |
| <b>Table S5</b>    | <i>SHAPE</i> analysis of the Dy3 in the clusters <b>1</b> and <b>2</b> .                                                                                                                        |
| <b>Table S6</b>    | <i>SHAPE</i> analysis of the Dy4 in the clusters <b>1</b> and <b>2</b> .                                                                                                                        |
| <b>Table S7</b>    | Parameters from the fitting result of the Cole-Cole plots for the cluster <b>1</b> under 0 Oe field.                                                                                            |
| <b>Table S8</b>    | Parameters from the fitting result of the Cole-Cole plots for the cluster <b>2</b> under 0 Oe field.                                                                                            |
| <b>Table S9</b>    | Selected parameters from the fitting result of the Cole-Cole plots for cluster <b>1</b> under 0 Oe fields.                                                                                      |
| Supporting Figures |                                                                                                                                                                                                 |
| <b>Figure S1</b>   | IR spectra of clusters <b>1</b> and <b>2</b> .                                                                                                                                                  |
| <b>Figure S2</b>   | Thermogravimetric (TG) curves of clusters <b>1</b> and <b>2</b> .                                                                                                                               |
| <b>Figure S3</b>   | Powder X-ray diffraction patterns (PXRD) of clusters <b>1</b> and <b>2</b> .                                                                                                                    |
| <b>Figure S4</b>   | Loop curve graph of clusters <b>1</b> and <b>2</b> at 2 K.                                                                                                                                      |
| <b>Figure S5</b>   | Temperature dependence of the in-phase ( $\chi'$ ) and out-of-phase ( $\chi''$ ) ac susceptibilities at different frequencies in the 0 Oe dc fields for clusters <b>1</b> (a) and <b>2</b> (b). |
| <b>Figure S6</b>   | (a and b) Cole-Cole for clusters <b>1</b> and <b>2</b> ; (c) Plots of $\ln(\chi''/\chi')$ vs. $T^{-1}$ for <b>1</b> ; (d) Energy barrier fits for cluster <b>2</b> .                            |
| <b>Figure S7</b>   | The fitting comparison of experimental and theoretical values of mass spectral molecular ion peaks of cluster <b>2</b> .                                                                        |

## Experimental Section

### Materials and Measurements.

All reagents were obtained from commercial sources and used without further purification. Elemental analyses for C, N, and H were performed on a varia MICRO cube. Infrared spectra were recorded by transmission through KBr pellets containing *ca.* 0.5% of the complexes using a PE Spectrum FT-IR spectrometer (400–4,000  $\text{cm}^{-1}$ ) (Figure S1). Thermogravimetric analyses (TGA) were conducted in a flow of nitrogen at a heating rate of 5  $^{\circ}\text{C}/\text{min}$  using a NETZSCH TG 209 F3 (Figure S2). Powder X-ray diffraction (PXRD) spectra were recorded on a D8 Advance (Bruker) diffractometer at 293 K (Mo-K $\alpha$ ). The samples were prepared by crushing crystals and the powder placed on a grooved aluminum plate. Diffraction patterns were recorded from 5 $^{\circ}$  to 55 $^{\circ}$  at a rate of 5 $^{\circ}$   $\text{min}^{-1}$  (Figure S3). Measurements of magnetic susceptibility were carried out within the temperature range of 2–300 K using a Quantum Design MPMS SQUID magnetometer equipped with a 7 T magnet. The diamagnetic corrections for these complexes were estimated using Pascal's constants, and magnetic data were corrected for diamagnetic contributions of the sample holder.

### Single-crystal X-ray crystallography.

Diffraction data for the complex were collected on a Bruker SMART CCD diffractometer (Cu-K $\alpha$  radiation and  $\lambda = 1.54 \text{ \AA}$ ) in  $\Phi$  and  $\omega$  scan modes. The structures were solved by direct methods, followed by difference Fourier syntheses, and then refined by full-matrix least-squares techniques on  $F^2$  using *SHELXL*<sup>[1]</sup>. All other non-hydrogen atoms were refined with anisotropic thermal parameters. Hydrogen atoms were placed at calculated positions and isotopically refined using a riding model. Table S1 summarizes X-ray crystallographic data and refinement details for the complexes. The CCDC reference numbers are 2217384 and 2217385 for **1** and **2**.

[1] Sheldrick, G. M. *Acta Crystallogr., Sect. C: Struct. Chem.* **2015**, *71*, 3-8.

## Reagents and Medicines

All reagents used in this experiment were of AR grade without further purification. All reagents used include: anhydrous methanol (500 mL, AR), acetonitrile (500 mL, AR), triethylamine (500 mL, AR), Dy(NO<sub>3</sub>)<sub>3</sub>·6H<sub>2</sub>O (100 g, AR), 4-(dimethylamino)-2-hydroxybenzaldehyde (25 g, AR), 4-diethylaminosalicylaldehyde (25 g, AR), salicylic hydrazide (50 g, AR).

## The synthesis method.

**Synthesis of cluster 1** ([Dy<sub>8</sub>(L<sup>1</sup>)<sub>4</sub>(μ<sub>3</sub>-O)<sub>2</sub>(CH<sub>3</sub>O)<sub>6</sub>(NO<sub>3</sub>)<sub>4</sub>(CH<sub>3</sub>OH)<sub>6</sub>(H<sub>2</sub>O)<sub>2</sub>]<sub>3</sub>·3CH<sub>3</sub>OH·CH<sub>3</sub>CN·H<sub>2</sub>O): Add 0.1 mmol (0.0165 g) 4-(dimethylamino)-2-hydroxybenzaldehyde, 0.1 mmol salicylic hydrazide (0.0152 g), 0.2 mmol (0.091 g) Dy(NO<sub>3</sub>)<sub>3</sub>·6H<sub>2</sub>O, 60 μL triethylamine and 2.5 mL mixed solutions (CH<sub>3</sub>OH : CH<sub>3</sub>CN = 2 : 0.5) were added in a pyrex tube. In the tube, shake and sonicate for 15 min. Place the sealed pyrex tube in an oven at 80 °C, take it out two days later, slowly cool to room temperature, and precipitate brown lumpy crystals. The yield is about 31.5% (calculated with the amount of Dy(NO<sub>3</sub>)<sub>3</sub>·6H<sub>2</sub>O). Elemental analysis theoretical value (C<sub>78</sub>H<sub>134</sub>Dy<sub>8</sub>O<sub>20</sub>N<sub>46</sub>): C, 28.08%; H, 4.09%; N, 19.31%; experimental value: C, 28.01%; H, 4.03%; N, 19.28%. Infrared spectrum data (IR, KBr pellet, cm<sup>-1</sup>): 3414(m), 2972(w), 2425(w), 1600(s), 1383(s), 1253(s), 1140(w), 1071(w), 837(w), 758(w), 489(m).

**Synthesis of cluster 2** ([Dy<sub>8</sub>(L<sup>2</sup>)<sub>4</sub>(μ<sub>3</sub>-O)<sub>2</sub>(CH<sub>3</sub>O)<sub>6</sub>(NO<sub>3</sub>)<sub>4</sub>(CH<sub>3</sub>OH)<sub>6</sub>(H<sub>2</sub>O)<sub>2</sub>]<sub>6</sub>·6CH<sub>3</sub>OH·CH<sub>3</sub>CN·H<sub>2</sub>O): The procedure was similar to that of cluster 1, except that the 4-(dimethylamino)-2-hydroxybenzaldehyde was replaced with 4-diethylaminosalicylaldehyde. The yield is about 29% (calculated with the amount of Dy(NO<sub>3</sub>)<sub>3</sub>·6H<sub>2</sub>O). Elemental analysis theoretical value (C<sub>96</sub>H<sub>170</sub>Dy<sub>8</sub>N<sub>18</sub>O<sub>52</sub>): C, 31.09%; H, 4.62%; N, 6.79%; experimental value: C, 31.02%; H, 4.59%; N, 6.75%. Infrared spectrum data (IR, KBr pellet, cm<sup>-1</sup>): 3403(m), 2423(w), 1599(s), 1512(m), 1382(s), 1251(m), 1138(w), 1060(w), 835(w), 756(w), 487(m).

**TableS1.** Crystallographic data of clusters **1** and **2**.

|                                                                         | <b>1</b>                                                                         | <b>2</b>                                                                         |
|-------------------------------------------------------------------------|----------------------------------------------------------------------------------|----------------------------------------------------------------------------------|
| Formula                                                                 | C <sub>78</sub> H <sub>134</sub> Dy <sub>8</sub> O <sub>20</sub> N <sub>46</sub> | C <sub>96</sub> H <sub>170</sub> Dy <sub>8</sub> N <sub>18</sub> O <sub>52</sub> |
| Formula weight                                                          | 3388.04                                                                          | 3648.75                                                                          |
| <i>T</i> , K                                                            | 100(10)                                                                          | 100(10)                                                                          |
| Crystal system                                                          | triclinic                                                                        | triclinic                                                                        |
| Space group                                                             | <i>P</i> -1                                                                      | <i>P</i> -1                                                                      |
| <i>a</i> , Å                                                            | 10.7519(2)                                                                       | 14.1647(4)                                                                       |
| <i>b</i> , Å                                                            | 15.0363(2)                                                                       | 14.3993(3)                                                                       |
| <i>c</i> , Å                                                            | 17.3580(3)                                                                       | 16.7338(4)                                                                       |
| $\alpha$ , °                                                            | 71.4304(13)                                                                      | 82.531(2)                                                                        |
| $\beta$ , °                                                             | 81.7596(16)                                                                      | 75.286(3)                                                                        |
| $\gamma$ , °                                                            | 84.3800(14)                                                                      | 82.046(2)                                                                        |
| <i>V</i> , Å <sup>3</sup>                                               | 2628.60 (8)                                                                      | 3253.05(14)                                                                      |
| <i>Z</i>                                                                | 1                                                                                | 1                                                                                |
| <i>D<sub>c</sub></i> , gcm <sup>-3</sup>                                | 2.140                                                                            | 1.863                                                                            |
| $\mu$ , mm <sup>-1</sup>                                                | 30.67                                                                            | 24.87                                                                            |
| <i>F</i> (000)                                                          | 1638                                                                             | 1780                                                                             |
| 2 $\theta$ range for data collection/°                                  | 6.2 to 149.8                                                                     | 5.4 to 151                                                                       |
| Reflns coll.                                                            | 33758                                                                            | 39484                                                                            |
| Unique reflns                                                           | 10572                                                                            | 13042                                                                            |
| <i>R</i> <sub>int</sub>                                                 | 0.077                                                                            | 0.0575                                                                           |
| Observed data [ <i>I</i> >2 $\sigma$ ( <i>I</i> )]                      | 9170                                                                             | 11961                                                                            |
| <i>N</i> <sub>par</sub> , <i>N</i> <sub>ref</sub>                       | 718, 10572                                                                       | 807, 3166                                                                        |
| <i>R</i> <sub>1</sub> <sup>a</sup> ( <i>I</i> >2 $\sigma$ ( <i>I</i> )) | 0.086                                                                            | 0.1024                                                                           |
| <i>wR</i> <sub>2</sub> <sup>b</sup> (all data)                          | 0.233                                                                            | 0.2811                                                                           |
| GOF                                                                     | 1.03                                                                             | 1.10                                                                             |

$${}^a R_1 = \sum ||F_o| - |F_c| | / \sum |F_o|, \quad {}^b wR_2 = [\sum w(F_o^2 - F_c^2)^2 / \sum w(F_o^2)^2]^{1/2}$$

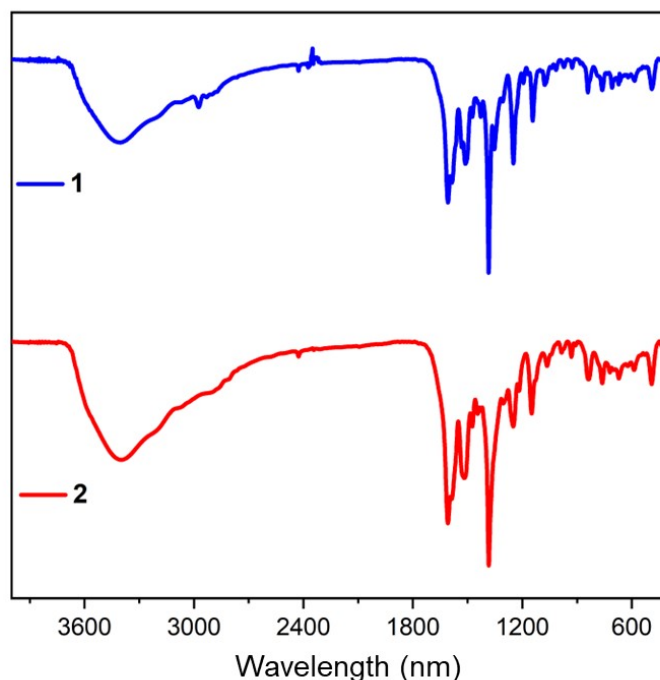

**Figure S1.** IR spectra of clusters **1** and **2**.

### Thermal analysis

The thermal stability tests of clusters **1** and **2** were carried out under a flowing nitrogen atmosphere, and the temperature was slowly increased from 35 °C to 1000 °C at a rate of 5 °C/min. The structures of clusters **1** and **2** are similar, so the thermal stability test results are basically the same. First, when the temperature is gradually increased from 35 °C to 78 °C, the weight loss is 4.42%. This process corresponds to a loss of three CH<sub>3</sub>OH molecules, one CH<sub>3</sub>CN molecule and one H<sub>2</sub>O molecules (theoretical value is 4.57%). When the temperature continues to rise 195 °C, the weight loss is 2.32%. This process corresponds to a loss of two CH<sub>3</sub>OH molecules and one H<sub>2</sub>O molecule (theoretical value is 2.43%). Finally, the weight loss is 7.81%, when the temperature continues to rise from 195 °C to 350 °C. This process corresponds to a loss of four CH<sub>3</sub>OH molecules and two NO<sub>3</sub><sup>-</sup> ions (theoretical value is 7.91%). When the temperature continues to rise above 350 °C, cluster **1** was decomposed as the temperature continued to rise (Figure S2a). Cluster **2** has a weight loss of 4.98% before 152°C, which corresponds to the loss of five CH<sub>3</sub>OH molecules and one H<sub>2</sub>O molecule (theoretical 4.88%). Then, the weight loss is 8.62%, when the temperature continues to rise from

152 °C to 360 °C. This process corresponds to a loss of seven CH<sub>3</sub>OH molecules, two H<sub>2</sub>O molecules and one CH<sub>3</sub>CN molecule (theoretical value is 8.68%). When the temperature continues to rise above 360 °C, cluster **2** was decomposed as the temperature continued to rise (Figure S2b).

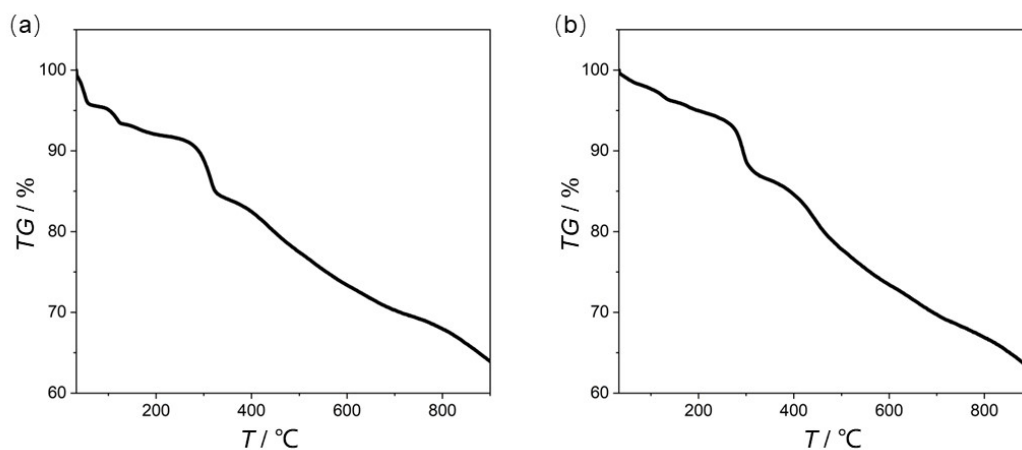

**Figure S2.** Thermogravimetric (TG) curves of clusters **1** and **2**.

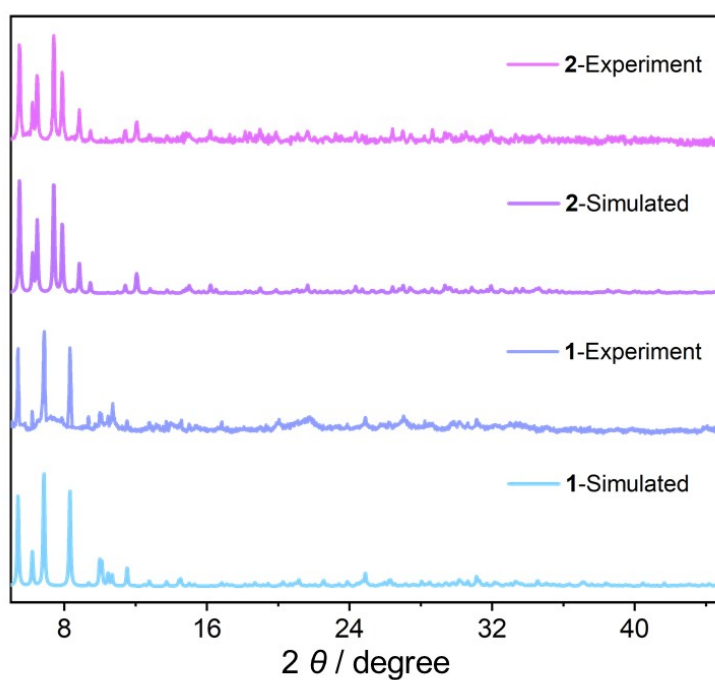

**Figure S3.** Powder X-ray diffraction patterns (PXRD) of clusters **1** and **2**.

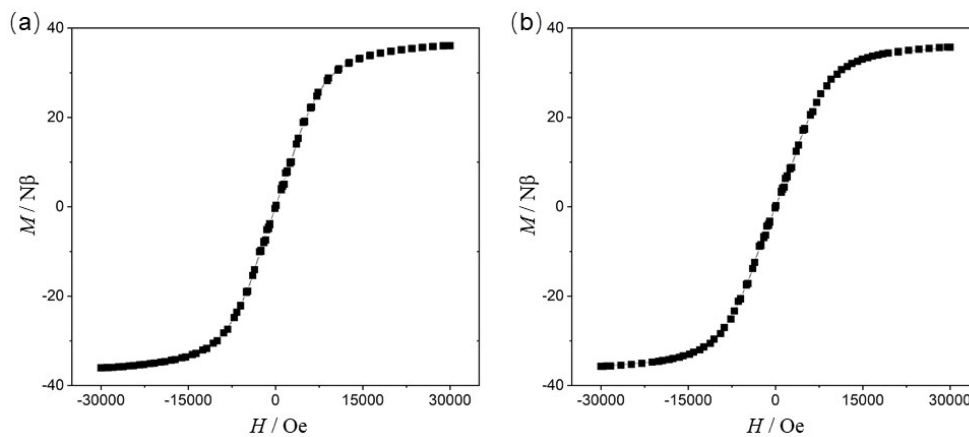

**Figure S4.** Loop curve graph of clusters **1** and **2** at 2 K.

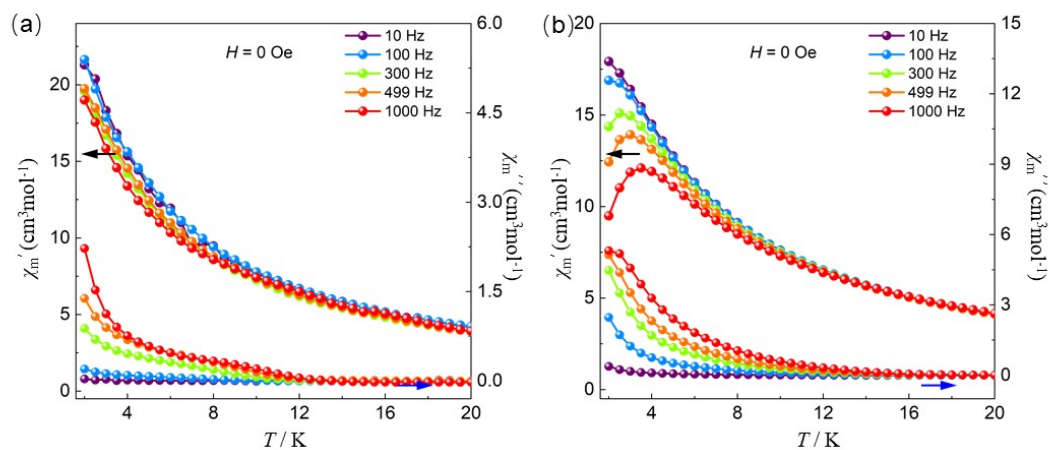

**Figure S5.** Temperature dependence of the real ( $\chi'$ ) and imaginary ( $\chi''$ ) ac susceptibilities at different frequencies in the 0 Oe dc fields for clusters **1** (a) and **2** (b).



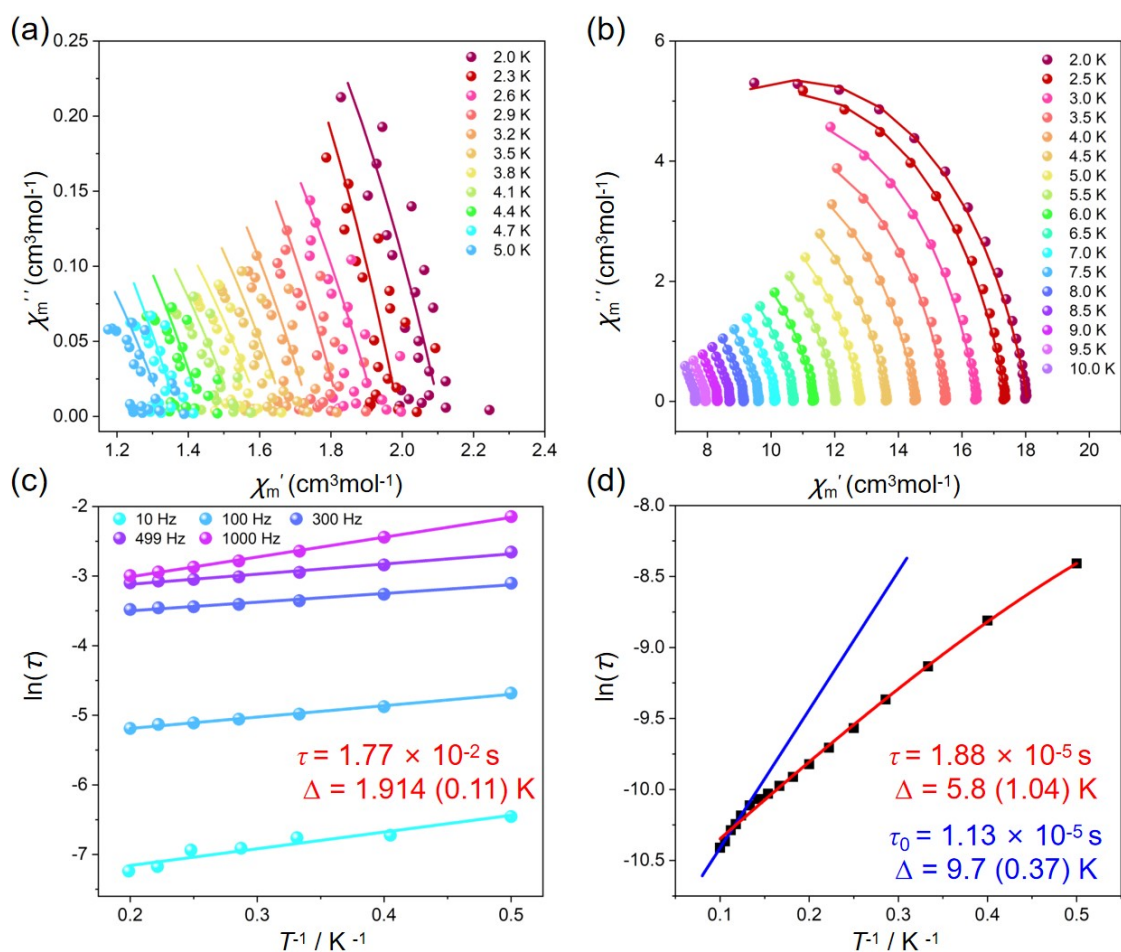

**Figure S6.** (a and b) Cole-Cole for clusters **1** and **2**; (c) Plots of  $\ln(\chi''/\chi')$  vs.  $T^{-1}$  for **1**; (d) Energy barrier fits for cluster **2**.

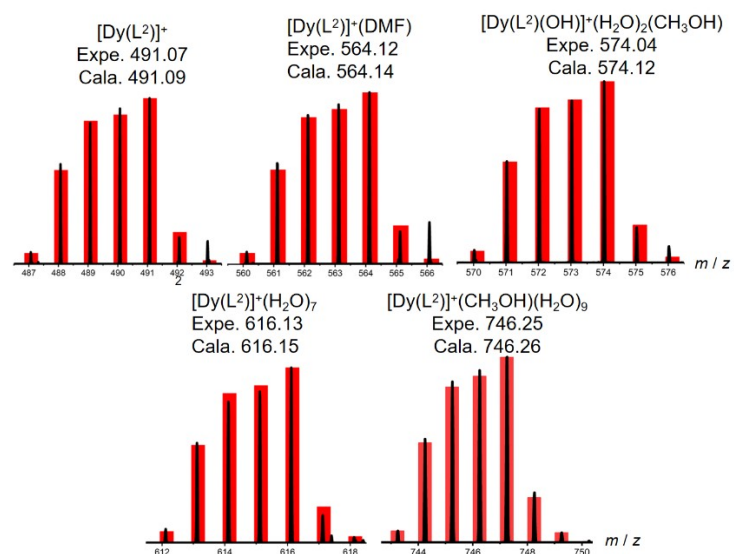

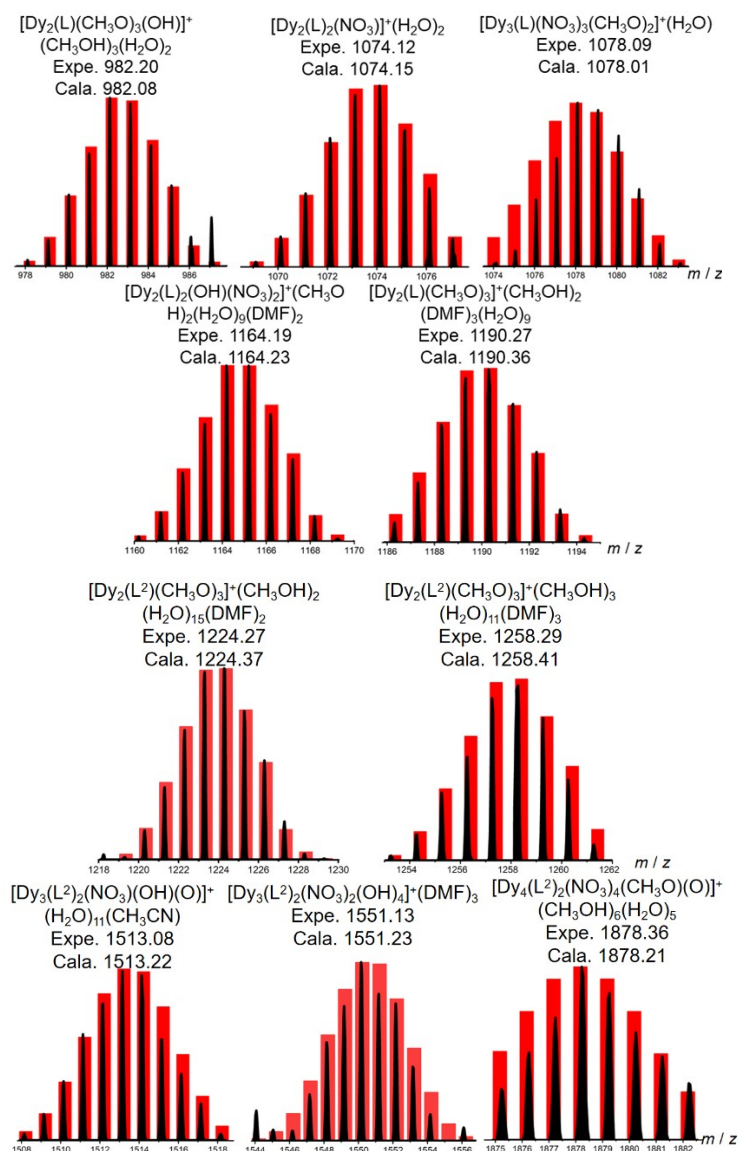

**Figure S7.** The fitting comparison of experimental and theoretical values of mass spectral molecular ion peaks of cluster 2.

**Table S2.** Selected bond lengths (Å) and angles (°) of cluster 1 and 2.

| Bond lengths of complex 1 (Å) |          |                      |          |         |          |
|-------------------------------|----------|----------------------|----------|---------|----------|
| Dy1-O5                        | 2.250(6) | Dy2-O29 <sup>i</sup> | 2.324(6) | Dy3-O68 | 2.479(6) |
| Dy1-O5 <sup>i</sup>           | 2.281(6) | Dy2-O43              | 2.348(6) | Dy3-O60 | 2.491(7) |
| Dy1-O54                       | 2.339(6) | Dy2-O30              | 2.376(6) | Dy3-O57 | 2.554(7) |
| Dy1-O29                       | 2.365(6) | Dy2-N40              | 2.436(7) | Dy4-O5  | 2.243(5) |
| Dy1-O43                       | 2.406(6) | Dy3-O69              | 2.555(7) | Dy4-O19 | 2.246(6) |
| Dy1-O63                       | 2.424(7) | Dy3-O61              | 2.276(6) | Dy4-O61 | 2.289(6) |

|         |          |         |          |                      |          |
|---------|----------|---------|----------|----------------------|----------|
| Dy1-O32 | 2.451(6) | Dy3-O6  | 2.343(6) | Dy4-O54 <sup>i</sup> | 2.309(6) |
| Dy1-O18 | 2.530(6) | Dy3-O55 | 2.366(6) | Dy4-O30              | 2.368(6) |
| Dy2-O44 | 2.249(6) | Dy3-O65 | 2.402(7) | Dy4-O18              | 2.423(6) |
| Dy2-O5  | 2.265(6) | Dy3-O30 | 2.425(6) | Dy4-N15              | 2.480(7) |
| Dy2-O6  | 2.314(6) |         |          |                      |          |

**Bond angles of complex 1 (°)**

|                          |            |                           |          |                          |          |
|--------------------------|------------|---------------------------|----------|--------------------------|----------|
| O5-Dy1-O5 <sup>i</sup>   | 75.7(2)    | O6-Dy2-O43                | 84.5(2)  | O55-Dy3-O57              | 126.7(2) |
| O5-Dy1-O54               | 124.8(2)   | O29 <sup>i</sup> -Dy2-O43 | 103.5(2) | O6-Dy3-O69               | 140.1(2) |
| O5 <sup>i</sup> -Dy1-O54 | 72.4(2)    | O44-Dy2-O30               | 81.2(2)  | O55-Dy3-O69              | 73.1(2)  |
| O5-Dy1-O29               | 119.5(2)   | O5-Dy2-O30                | 76.2(2)  | O65-Dy3-O69              | 67.8(2)  |
| O5 <sup>i</sup> -Dy1-O29 | 73.1(2)    | O6-Dy2-O30                | 71.0(2)  | O30-Dy3-O69              | 127.8(2) |
| O54-Dy1-O29              | 92.5(2)    | O29 <sup>i</sup> -Dy2-O30 | 96.8(2)  | O68-Dy3-O69              | 51.2(2)  |
| O5-Dy1-O43               | 70.8(2)    | O6-Dy2-N40                | 101.0(2) | O60-Dy3-O69              | 68.3(2)  |
| O5 <sup>i</sup> -Dy1-O43 | 98.6(2)    | O29 <sup>i</sup> -Dy2-N40 | 91.1(2)  | O57-Dy3-O69              | 102.0(2) |
| O54-Dy1-O43              | 70.9(2)    | O43-Dy2-N40               | 65.1(2)  | O6-Dy3-O55               | 79.7(2)  |
| O29-Dy1-O43              | 163.2(2)   | O30-Dy2-N40               | 154.5(2) | O65-Dy3-O57              | 134.8(2) |
| O5-Dy1-O63               | 146.3(2)   | O5-Dy2-N40                | 129.2(2) | O30-Dy3-O57              | 130.3(2) |
| O5 <sup>i</sup> -Dy1-O63 | 137.8(2)   | O61-Dy3-O6                | 86.0(2)  | O68-Dy3-O57              | 68.3(2)  |
| O54-Dy1-O63              | 78.8(2)    | O61-Dy3-O55               | 147.3(2) | O60-Dy3-O57              | 50.9(2)  |
| O29-Dy1-O63              | 78.1(2)    | O43-Dy2-O30               | 135.1(2) | O61-Dy3-O69              | 131.5(2) |
| O43-Dy1-O63              | 100.4(2)   | O44-Dy2-N40               | 74.1(2)  | O30-Dy4-N15              | 154.4(2) |
| O5-Dy1-O32               | 80.4(2)    | O5-Dy2-O43                | 71.6(2)  | O18-Dy4-N15              | 64.4(2)  |
| O5 <sup>i</sup> -Dy1-O32 | 156.2(2)   | O61-Dy3-O65               | 80.9(2)  | O5-Dy4-O19               | 153.8(2) |
| O54-Dy1-O32              | 123.1(2)   | O6-Dy3-O65                | 143.6(2) | O5-Dy4-O61               | 105.8(2) |
| O29-Dy1-O32              | 120.1(2)   | O55-Dy3-O65               | 93.6(2)  | O19-Dy4-O61              | 86.2(2)  |
| O43-Dy1-O32              | 73.2(2)    | O6-Dy3-O30                | 69.7(2)  | O5-Dy4-O54 <sup>i</sup>  | 73.6(2)  |
| O63-Dy1-O32              | 66.0(2)    | O55-Dy3-O30               | 75.2(2)  | O19-Dy4-O54 <sup>i</sup> | 90.1(2)  |
| O5-Dy1-O18               | 68.6(2)    | O65-Dy3-O30               | 74.1(2)  | O61-Dy4-O54 <sup>i</sup> | 169.2(2) |
| O5 <sup>i</sup> -Dy1-O18 | 100.31(19) | O61-Dy3-O68               | 85.1(2)  | O5-Dy4-O30               | 76.8(2)  |
| O54-Dy1-O18              | 160.3(2)   | O6-Dy3-O68                | 140.1(2) | O19-Dy4-O30              | 85.0(2)  |

|                          |            |             |          |                           |          |
|--------------------------|------------|-------------|----------|---------------------------|----------|
| O29-Dy1-O18              | 67.82(19)  | O55-Dy3-O68 | 124.0(2) | O61-Dy4-O30               | 73.2(2)  |
| O43-Dy1-O18              | 128.76(19) | O65-Dy3-O68 | 72.4(2)  | O54 <sup>i</sup> -Dy4-O30 | 96.3(2)  |
| O63-Dy1-O18              | 96.5(2)    | O30-Dy3-O68 | 142.0(2) | O5-Dy4-O18                | 70.7(2)  |
| O32-Dy1-O18              | 70.5(2)    | O61-Dy3-O60 | 125.4(2) | O19-Dy4-O18               | 134.6(2) |
| O44-Dy2-O5               | 152.6(2)   | O6-Dy3-O60  | 79.0(2)  | O61-Dy4-O18               | 84.1(2)  |
| O44-Dy2-O6               | 87.1(2)    | O55-Dy3-O60 | 80.5(2)  | O54 <sup>i</sup> -Dy4-O18 | 105.6(2) |
| O5-Dy2-O6                | 100.0(2)   | O65-Dy3-O60 | 135.5(2) | O30-Dy4-O18               | 133.1(2) |
| O44-Dy2-O29 <sup>i</sup> | 93.4(2)    | O30-Dy3-O60 | 143.0(2) | O5-Dy4-N15                | 128.5(2) |
| O5-Dy2-O29 <sup>i</sup>  | 74.2(2)    | O68-Dy3-O60 | 75.0(2)  | O19-Dy4-N15               | 72.1(2)  |
| O6-Dy2-O29 <sup>i</sup>  | 167.6(2)   | O61-Dy3-O57 | 74.6(2)  | O61-Dy4-N15               | 93.6(2)  |
| O44-Dy2-O43              | 135.8(2)   | O6-Dy3-O57  | 71.9(2)  | O54 <sup>i</sup> -Dy4-N15 | 95.0(2)  |

**Bond lengths of complex 2 (Å)**

|                     |          |                     |          |                     |           |
|---------------------|----------|---------------------|----------|---------------------|-----------|
| Dy1-O8 <sup>i</sup> | 2.301(8) | Dy2-O3 <sup>i</sup> | 2.290(8) | Dy3-O15             | 2.462(9)  |
| Dy1-O8              | 2.246(9) | Dy2-O5              | 2.393(9) | Dy3-O11             | 2.349(8)  |
| Dy1-O4              | 2.371(8) | Dy2-O7              | 2.359(9) | Dy3-O12             | 2.389(9)  |
| Dy1-O10             | 2.491(8) | Dy2-N5              | 2.463(9) | Dy4-O8              | 2.271(8)  |
| Dy1-O3              | 2.344(8) | Dy3-O20             | 2.557(9) | Dy4-O4 <sup>i</sup> | 2.319(8)  |
| Dy1-O5              | 2.498(8) | Dy3-O14             | 2.237(9) | Dy4-O1              | 2.257(9)  |
| Dy1-O2              | 2.419(8) | Dy3-O7              | 2.426(8) | Dy4-O14             | 2.299(8)  |
| Dy1-O9              | 2.401(9) | Dy3-O13             | 2.448(9) | Dy4-O7              | 2.401(9)  |
| Dy2-O8              | 2.239(8) | Dy3-O18             | 2.494(9) | Dy4-O2              | 2.364(9)  |
| Dy2-O11             | 2.298(8) | Dy3-O17             | 2.511(9) | Dy4-N2              | 2.455(10) |
| Dy2-O6              | 2.249(9) |                     |          |                     |           |

**Bond angles of complex 2 (°)**

|                          |          |                        |          |             |          |
|--------------------------|----------|------------------------|----------|-------------|----------|
| O8-Dy1-O8 <sup>i</sup>   | 76.4(3)  | O11-Dy2-O7             | 72.0(3)  | O7-Dy3-O20  | 129.6(3) |
| O8-Dy1-O4                | 121.5(3) | O11-Dy2-N5             | 101.4(3) | O7-Dy3-O13  | 72.2(3)  |
| O8 <sup>i</sup> -Dy1-O4  | 72.3(3)  | O6-Dy2-O11             | 88.1(3)  | O7-Dy3-O18  | 146.3(3) |
| O8-Dy1-O10               | 80.6(3)  | O6-Dy2-O3 <sup>i</sup> | 92.4(3)  | O14-Dy3-O17 | 88.1(3)  |
| O8 <sup>i</sup> -Dy1-O10 | 156.9(3) | O6-Dy2-O5              | 133.5(3) | O14-Dy3-O15 | 133.5(3) |
| O8-Dy1-O3                | 122.8(3) | O6-Dy2-O7              | 84.2(3)  | O18-Dy3-O20 | 50.7(3)  |

---

|                         |          |                          |          |                         |          |
|-------------------------|----------|--------------------------|----------|-------------------------|----------|
| O8 <sup>i</sup> -Dy1-O3 | 72.1(3)  | O6-Dy2-N5                | 72.2(3)  | O7-Dy3-O17              | 142.9(3) |
| O8-Dy1-O5               | 68.9(3)  | O3 <sup>i</sup> -Dy2-O11 | 168.2(3) | O7-Dy3-O15              | 125.5(3) |
| O8 <sup>i</sup> -Dy1-O5 | 99.0(3)  | O3 <sup>i</sup> -Dy2-O5  | 103.8(3) | O13-Dy3-O20             | 133.2(3) |
| O8 <sup>i</sup> -Dy1-O2 | 101.1(3) | O3 <sup>i</sup> -Dy2-O7  | 96.3(3)  | O13-Dy3-O18             | 136.2(3) |
| O8-Dy1-O2               | 70.2(3)  | O3 <sup>i</sup> -Dy2-N5  | 90.0(3)  | O13-Dy3-O17             | 73.5(3)  |
| O8 <sup>i</sup> -Dy1-O9 | 135.9(3) | O5-Dy2-N5                | 64.7(3)  | O13-Dy3-O15             | 69.8(3)  |
| O8-Dy1-O9               | 147.8(3) | O7-Dy2-O5                | 135.1(3) | O15-Dy3-O20             | 104.9(3) |
| O4-Dy1-O10              | 120.2(3) | O7-Dy2-N5                | 155.9(3) | O15-Dy3-O18             | 68.3(3)  |
| O4-Dy1-O5               | 69.0(3)  | O11-Dy3-O12              | 78.1(3)  | O15-Dy3-O17             | 51.2(3)  |
| O4-Dy1-O2               | 163.0(3) | O11-Dy3-O20              | 72.7(3)  | O8-Dy4-O4 <sup>i</sup>  | 73.8(3)  |
| O4-Dy1-O9               | 78.0(3)  | O11-Dy3-O7               | 69.9(3)  | O8-Dy4-O14              | 105.7(3) |
| O10-Dy1-O5              | 71.1(3)  | O11-Dy3-O13              | 142.0(3) | O8-Dy4-O7               | 75.3(3)  |
| O3-Dy1-O4               | 92.2(3)  | O11-Dy3-O18              | 80.8(3)  | O8-Dy4-O2               | 70.8(3)  |
| O3-Dy1-O10              | 123.1(3) | O11-Dy3-O17              | 141.2(3) | O8-Dy4-N2               | 129.8(3) |
| O3-Dy1-O5               | 161.1(3) | O11-Dy3-O15              | 138.6(3) | O4 <sup>i</sup> -Dy4-O7 | 94.6(3)  |
| O3-Dy1-O2               | 70.8(3)  | O12-Dy3-O20              | 126.4(3) | O4 <sup>i</sup> -Dy4-O2 | 106.0(3) |
| O3-Dy1-O9               | 77.3(3)  | O12-Dy3-O7               | 76.7(3)  | O4 <sup>i</sup> -Dy4-N2 | 96.1(3)  |
| O2-Dy1-O10              | 71.8(3)  | O12-Dy3-O13              | 96.7(3)  | O1-Dy4-O8               | 150.7(3) |
| O2-Dy1-O5               | 128.0(3) | O12-Dy3-O18              | 81.3(3)  | O1-Dy4-O4 <sup>i</sup>  | 87.5(3)  |
| O9-Dy1-O10              | 67.2(3)  | O12-Dy3-O17              | 121.2(3) | O1-Dy4-O14              | 86.7(3)  |
| O9-Dy1-O5               | 99.9(3)  | O12-Dy3-O15              | 70.7(3)  | O1-Dy4-O7               | 84.2(3)  |
| O9-Dy1-O2               | 97.9(3)  | O14-Dy3-O11              | 86.5(3)  | O1-Dy4-O2               | 137.4(3) |
| O8-Dy2-O11              | 100.8(3) | O14-Dy3-O12              | 148.1(3) | O1-Dy4-N2               | 73.5(3)  |
| O8-Dy2-O6               | 155.1(3) | O14-Dy3-O20              | 73.4(3)  | O14-Dy4-O4 <sup>i</sup> | 165.1(3) |
| O8-Dy2-O3 <sup>i</sup>  | 74.2(3)  | O14-Dy3-O7               | 71.8(3)  | O14-Dy4-O7              | 71.2(3)  |
| O8-Dy2-O5               | 70.9(3)  | O14-Dy3-O13              | 78.5(3)  | O14-Dy4-O2              | 87.5(3)  |
| O8-Dy2-O7               | 76.7(3)  | O14-Dy3-O18              | 123.9(3) | O14-Dy4-N2              | 95.4(3)  |
| O8-Dy2-N5               | 127.3(3) | O18-Dy3-O17              | 70.7(3)  | O7-Dy4-N2               | 154.7(3) |
| O11-Dy2-O5              | 84.3(3)  | O17-Dy3-O20              | 68.9(3)  | O2-Dy4-O7               | 132.9(3) |
| O2-Dy4-N2               | 65.1(3)  |                          |          |                         |          |

---

**Table S3.** SHAPE analysis of the Dy1 in the clusters 1 and 2.

| Label   | Shape    | Symmetry                                   | Distortion (°) |          |
|---------|----------|--------------------------------------------|----------------|----------|
|         |          |                                            | Dy1 (1)        | Dy1 (2)  |
| HP-7    | $D_{7h}$ | Heptagon                                   | 47.67678       | 46.41484 |
| HPY-7   | $C_{6v}$ | Hexagonal pyramid                          | 35.02654       | 33.98077 |
| PBPY-7  | $D_{5h}$ | Pentagonal bipyramid                       | 27.14682       | 27.20226 |
| COC-7   | $C_{3v}$ | Capped octahedron                          | 28.55928       | 28.25368 |
| CTPR-7  | $C_{2v}$ | Capped trigonal prism                      | 27.44894       | 27.95044 |
| JPBPY-7 | $D_{5h}$ | Johnson pentagonal bipyramid J13           | 32.28464       | 32.37441 |
| JETPY-7 | $C_{3v}$ | Johnson elongated triangular pyramid<br>J7 | 33.75690       | 32.91938 |

**Table S4.** SHAPE analysis of the Dy2 in the clusters 1 and 2.

| Label    | Shape    | Symmetry                                      | Distortion (°) |          |
|----------|----------|-----------------------------------------------|----------------|----------|
|          |          |                                               | Dy2 (1)        | Dy2 (2)  |
| OP-8     | $D_{8h}$ | Octagon                                       | 44.71560       | 44.57769 |
| HPY-8    | $C_{7v}$ | Heptagonal pyramid                            | 31.60690       | 31.41839 |
| HBPY-8   | $D_{6h}$ | Hexagonal bipyramid                           | 29.64515       | 29.54543 |
| CU-8     | $O_h$    | Cube                                          | 24.95490       | 24.79237 |
| SAPR-8   | $D_{4d}$ | Square antiprism                              | 25.30011       | 25.31050 |
| TDD-8    | $D_{2d}$ | Triangular dodecahedron                       | 23.11296       | 23.23515 |
| JGBF-8   | $D_{2d}$ | Johnson gyrobifastigium J26                   | 30.31710       | 30.66463 |
| JETBPY-8 | $D_{3h}$ | Johnson elongated triangular bipyramid<br>J14 | 37.59994       | 37.49979 |
| JBTP-8   | $C_{2v}$ | Biaugmented trigonal prism J50                | 25.08216       | 25.26054 |
| BTPR-8   | $C_{2v}$ | Biaugmented trigonal prism                    | 25.40354       | 25.90108 |
| JSD-8    | $D_{2d}$ | Snub diphenoid J84                            | 26.10376       | 26.33839 |
| TT-8     | $T_d$    | Triakis tetrahedron                           | 23.56992       | 23.44739 |
| ETBPY-8  | $D_{3h}$ | Elongated trigonal bipyramid                  | 35.36388       | 36.02676 |

**Table S5.** SHAPE analysis of the Dy3 in the clusters 1 and 2.

| Label   | Shape    | Symmetry                                | Distortion (°) |          |
|---------|----------|-----------------------------------------|----------------|----------|
|         |          |                                         | Dy3 (1)        | Dy3 (2)  |
| HP-7    | $D_{7h}$ | Heptagon                                | 46.43467       | 47.09985 |
| HPY-7   | $C_{6v}$ | Hexagonal pyramid                       | 34.34694       | 35.58078 |
| PBPY-7  | $D_{5h}$ | Pentagonal bipyramid                    | 27.37341       | 27.31557 |
| COC-7   | $C_{3v}$ | Capped octahedron                       | 28.59610       | 28.78542 |
| CTPR-7  | $C_{2v}$ | Capped trigonal prism                   | 28.16606       | 27.69416 |
| JPBPY-7 | $D_{5h}$ | Johnson pentagonal bipyramid J13        | 32.70556       | 32.44131 |
| JETPY-7 | $C_{3v}$ | Johnson elongated triangular pyramid J7 | 32.92396       | 33.76365 |

**Table S6.** SHAPE analysis of the Dy4 in the clusters **1** and **2**.

| Label    | Shape    | Symmetry                           | Distortion (°) |          |
|----------|----------|------------------------------------|----------------|----------|
|          |          |                                    | Dy4 (1)        | Dy4 (2)  |
| EP-9     | $D_{9h}$ | Enneagon                           | 48.25672       | 43.71009 |
| OPY-9    | $C_{8v}$ | Octagonal pyramid                  | 38.01793       | 35.61322 |
| HBPY-9   | $D_{7h}$ | Heptagonal bipyramid               | 35.17871       | 34.06055 |
| JTC-9    | $C_{3v}$ | Johnson triangular cupola J3       | 28.54213       | 23.81293 |
| JCCU-9   | $C_{4v}$ | Capped cube J8                     | 28.92568       | 27.21980 |
| CCU-9    | $C_{4v}$ | Spherical-relaxed capped cube      | 28.33736       | 27.78523 |
| JCSAPR-9 | $C_{4v}$ | Capped square antiprism J10        | 22.56189       | 21.20988 |
| CSAPR-9  | $C_{4v}$ | Spherical capped square antiprism  | 22.46010       | 21.64890 |
| JTCTPR-9 | $D_{3h}$ | Tricapped trigonal prism J51       | 21.11212       | 20.46027 |
| TCTPR-9  | $D_{3h}$ | Spherical tricapped trigonal prism | 22.51160       | 21.90571 |
| JTDIC-9  | $C_{3v}$ | Tridiminished icosahedron J63      | 31.54964       | 28.27652 |
| HH-9     | $C_{2v}$ | Hula-hoop                          | 28.88224       | 28.13913 |
| MFF-9    | $C_s$    | Muffin                             | 22.12765       | 22.03713 |

**Table S7.** Parameters from the fitting result of the Cole-Cole plots for the cluster **1** under 0 Oe field.

| Temp.(K) | <b>1</b>   |          |          |
|----------|------------|----------|----------|
|          | $\tau$     | $\alpha$ | residual |
| 2.0      | 6.42814E-6 | 0.463    | 0.0666   |
| 2.3      | 5.84223E-6 | 0.42326  | 0.05574  |
| 2.6      | 2.52193E-6 | 0.53267  | 0.06066  |
| 2.9      | 2.47095E-6 | 0.51236  | 0.04936  |
| 3.2      | 1.63708E-6 | 0.55178  | 0.0461   |
| 3.5      | 1.03053E-6 | 0.59284  | 0.05261  |
| 3.8      | 6.48952E-7 | 0.62752  | 0.04035  |
| 4.1      | 7.12875E-7 | 0.6206   | 0.04059  |
| 4.4      | 9.72806E-7 | 0.57349  | 0.03696  |
| 4.7      | 1.03708E-6 | 0.55546  | 0.02877  |
| 5.0      | 6.21776E-7 | 0.61446  | 0.03936  |

**Table S8.** Parameters from the fitting result of the Cole-Cole plots for the cluster **2** under 0 Oe field.

| Temp.(K) | <b>2</b>   |          |          |
|----------|------------|----------|----------|
|          | $\tau$     | $\alpha$ | residual |
| 2        | 2.23008E-4 | 0.18964  | 0.10006  |
| 2.5      | 1.49185E-4 | 0.17692  | 0.07606  |
| 3        | 1.08023E-4 | 0.17657  | 0.06318  |
| 3.5      | 8.56003E-5 | 0.17877  | 0.04731  |
| 4        | 6.99515E-5 | 0.1855   | 0.03796  |

|     |            |         |         |
|-----|------------|---------|---------|
| 4.5 | 6.09243E-5 | 0.18915 | 0.03041 |
| 5   | 5.42331E-5 | 0.19344 | 0.0261  |
| 5.5 | 4.96142E-5 | 0.19695 | 0.02171 |
| 6   | 4.65577E-5 | 0.19849 | 0.02018 |
| 6.5 | 4.40635E-5 | 0.20072 | 0.01459 |
| 7   | 4.2437E-5  | 0.19874 | 0.01541 |
| 7.5 | 4.05654E-5 | 0.20079 | 0.01131 |
| 8   | 3.66212E-5 | 0.20715 | 0.00891 |
| 8.5 | 3.55635E-5 | 0.20384 | 0.00888 |
| 9   | 3.37898E-5 | 0.20399 | 0.00797 |
| 9.5 | 3.32683E-5 | 0.19693 | 0.00737 |
| 10  | 3.01148E-5 | 0.1952  | 0.00602 |

**Table S9.** Selected parameters from the fitting result of the Cole-Cole plots for **1** under 0 Oe fields.

| Frequency (Hz) | $\Delta$ (K) | $\tau_0$ (s)          |
|----------------|--------------|-----------------------|
| 10             | 2.84788      | $2.78 \times 10^{-2}$ |
| 100            | 1.45621      | $3.33 \times 10^{-2}$ |
| 300            | 1.24737      | $2.35 \times 10^{-2}$ |
| 499            | 1.63634      | $4.02 \times 10^{-3}$ |
| 100            | 2.40405      | $4.80 \times 10^{-4}$ |
